# Supplementary material for: An all-inorganic CsPbBr3/GaN hetero-structure for a near UV to green band photodetector
Source: Royal Society of Chemistry journal article supplement (doi:10.1039/d1tc04991g), 2021-12-01
Supplement: d1tc04991g1.pdf [file d1tc04991g1.pdf]

## **All-inorganic CsPbBr<sub>3</sub>/GaN hetero-structure for near UV to green band photodetector**

Longxing Su,<sup>\*a</sup> Yue Zhang,<sup>a</sup> Jin Xie<sup>\*a</sup>

<sup>a</sup> School of Physical Science and Technology, ShanghaiTech University, Shanghai 201210, P. R. China

<sup>\*</sup>Corresponding Authors

<sup>\*</sup>Email: [sulx@shanghaitech.edu.cn](mailto:sulx@shanghaitech.edu.cn)

<sup>\*</sup>Email: [xiejin@shanghaitech.edu.cn](mailto:xiejin@shanghaitech.edu.cn)

### **This file includes:**

Supplementary Text

Fig. S1. Atomic configurations of GaN and CsPbBr<sub>3</sub>; measurement configuration for CsPbBr<sub>3</sub>/GaN heterojunction photodetector.

**Fig. S2. The photograph of the CsPbBr<sub>3</sub>/GaN photodetector.**

Fig. S3. Bright-field optical image of CsPbBr<sub>3</sub> monocrystal and schematic view on different facets of corresponding CsPbBr<sub>3</sub> monocrystal.

Fig. S4. SEM image and EDS spectra of CsPbBr<sub>3</sub> monocrystal.

**Fig. S5 The *I-V* curves of (a) Ni/Au-GaN-Ni/Au device and (b) ITO-CsPbBr<sub>3</sub>-ITO device under dark.**

Fig. S6. Detectivity of the CsPbBr<sub>3</sub>/GaN photodetector under different bias voltages.

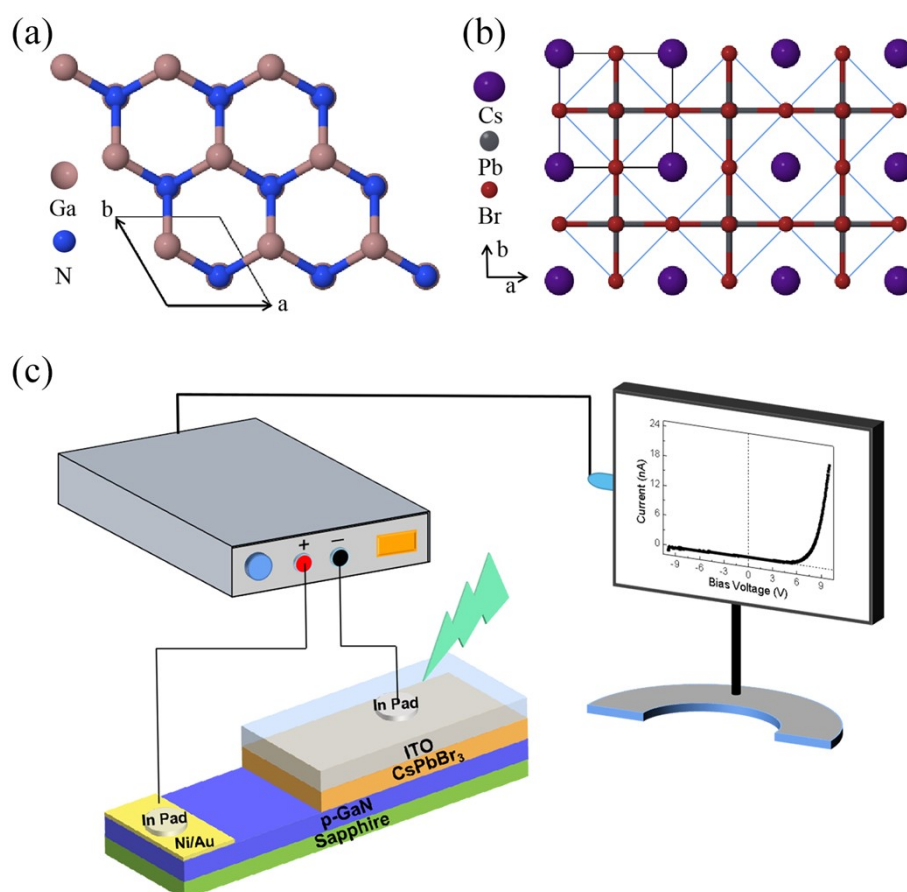

**Fig. S1** Schematic presentation of atomic configuration of (a) hexagonal GaN and (b) orthorhombic CsPbBr<sub>3</sub>; (c) the photoresponse measurement configuration for CsPbBr<sub>3</sub>/GaN heterojunction photodetector.

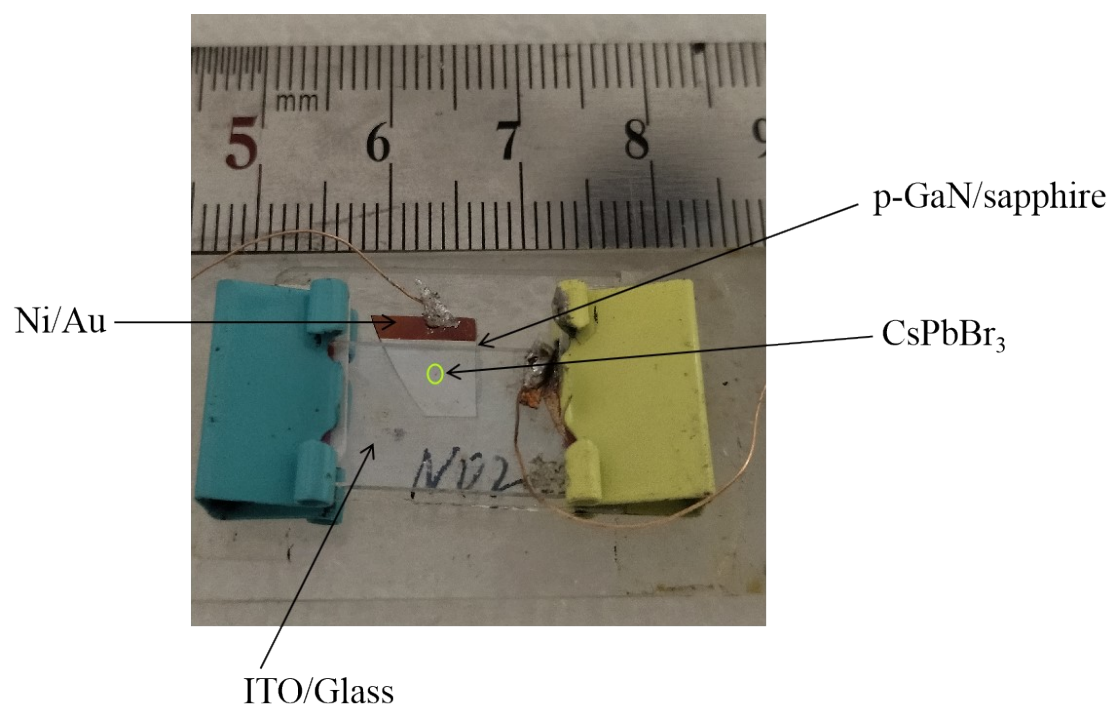

**Fig. S2. The photograph of the CsPbBr<sub>3</sub>/GaN photodetector.**

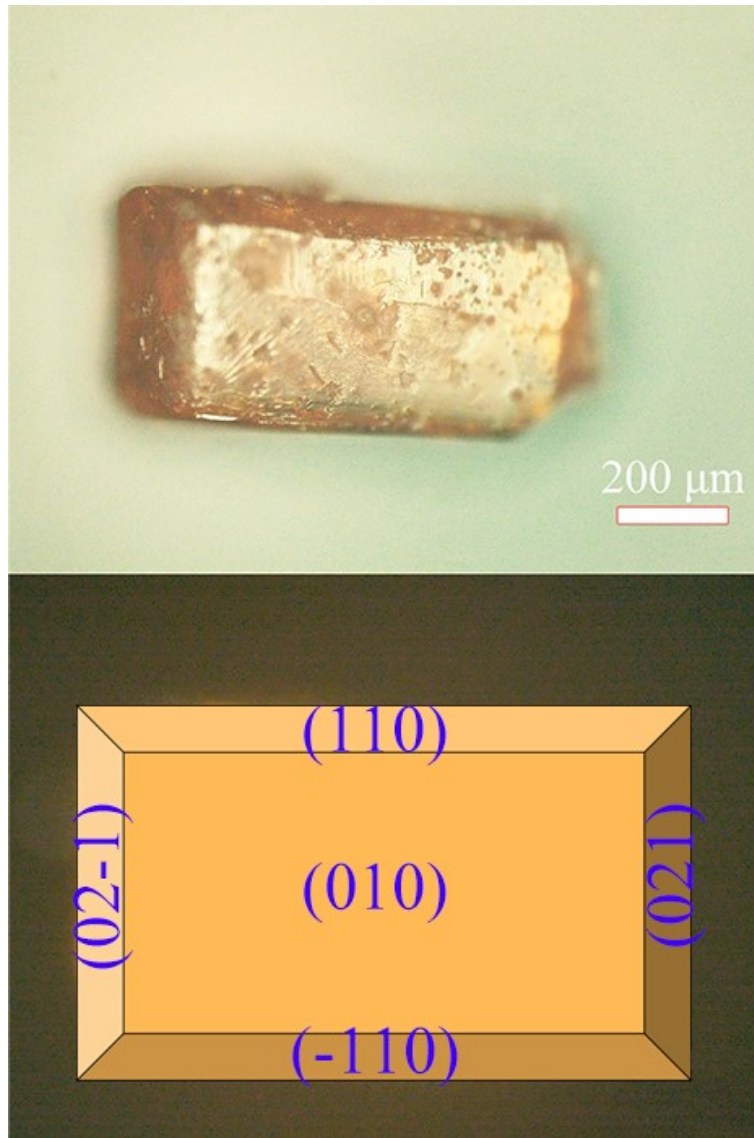

**Fig. S3** Bright-field optical image of CsPbBr<sub>3</sub> monocrystal and schematic view on different facets of corresponding CsPbBr<sub>3</sub> monocrystal.

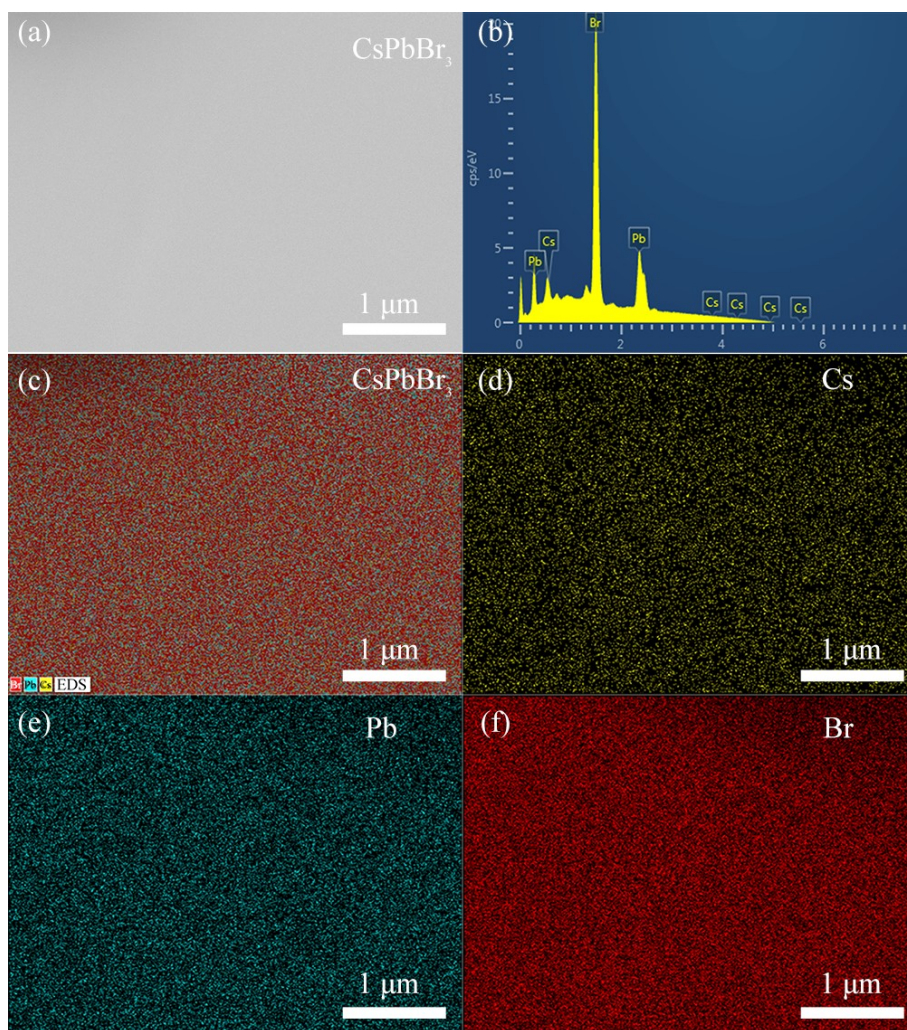

**Fig. S4** (a) SEM image of CsPbBr<sub>3</sub> monocrystal; (b) EDS spectrum of CsPbBr<sub>3</sub> monocrystal; (c-f) EDS elemental mapping of Cs, Pb, and Br elements on the surface of CsPbBr<sub>3</sub> monocrystal.

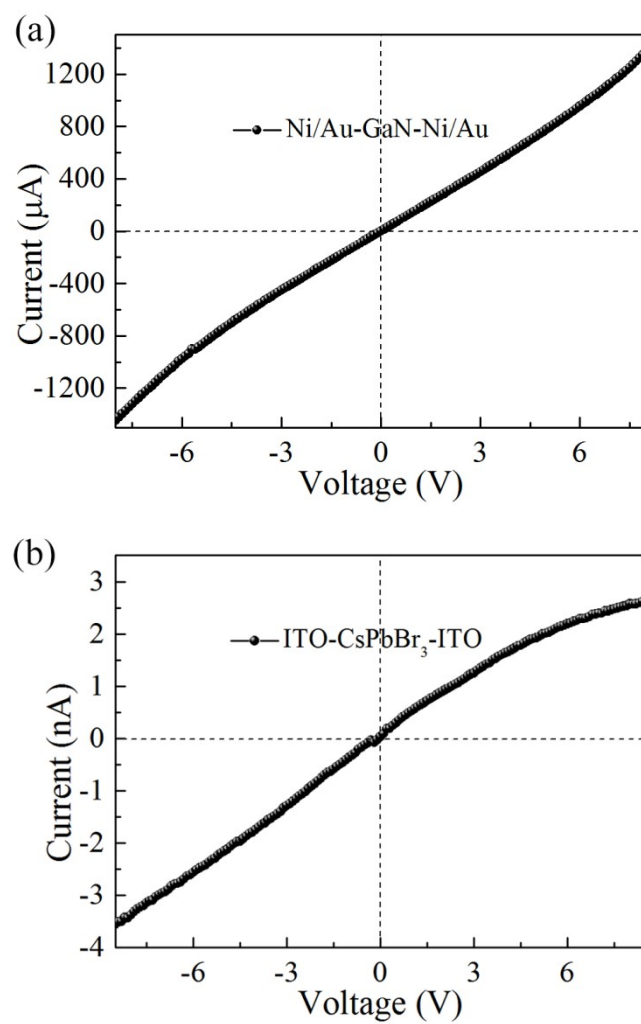

**Figure S5 The  $I$ - $V$  curves of (a) Ni/Au-GaN-Ni/Au device and (b) ITO-CsPbBr<sub>3</sub>-ITO device under dark.**

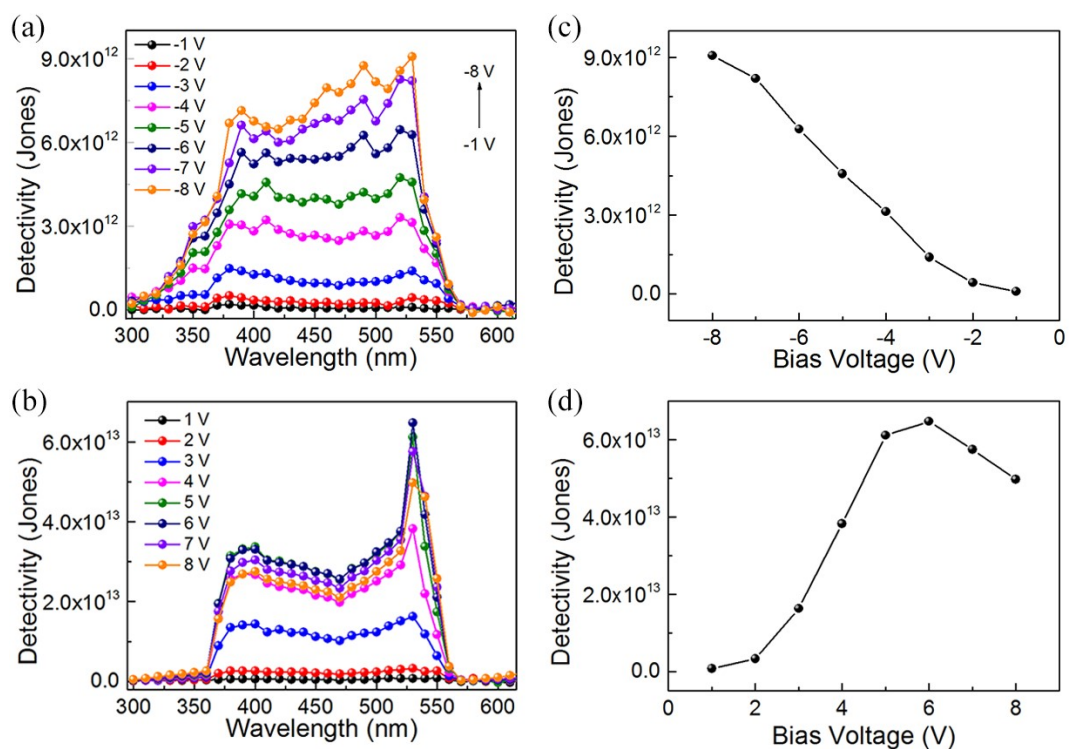

**Fig. S6** Detectivity of the device under (a) negative bias voltages and (b) positive bias voltages; Maximum detectivity of the device as a function of (c) negative bias voltages and (d) positive bias voltages.
